# Supplementary material for: Case Report: Myocarditis Associated With COVID-19 mRNA Vaccination Following Myocarditis Associated With Campylobacter Jejuni
Source: PubMed Central journal article supplement (PMC8971558; doi:10.3389/fcvm.2022.837759), 2022-03-18

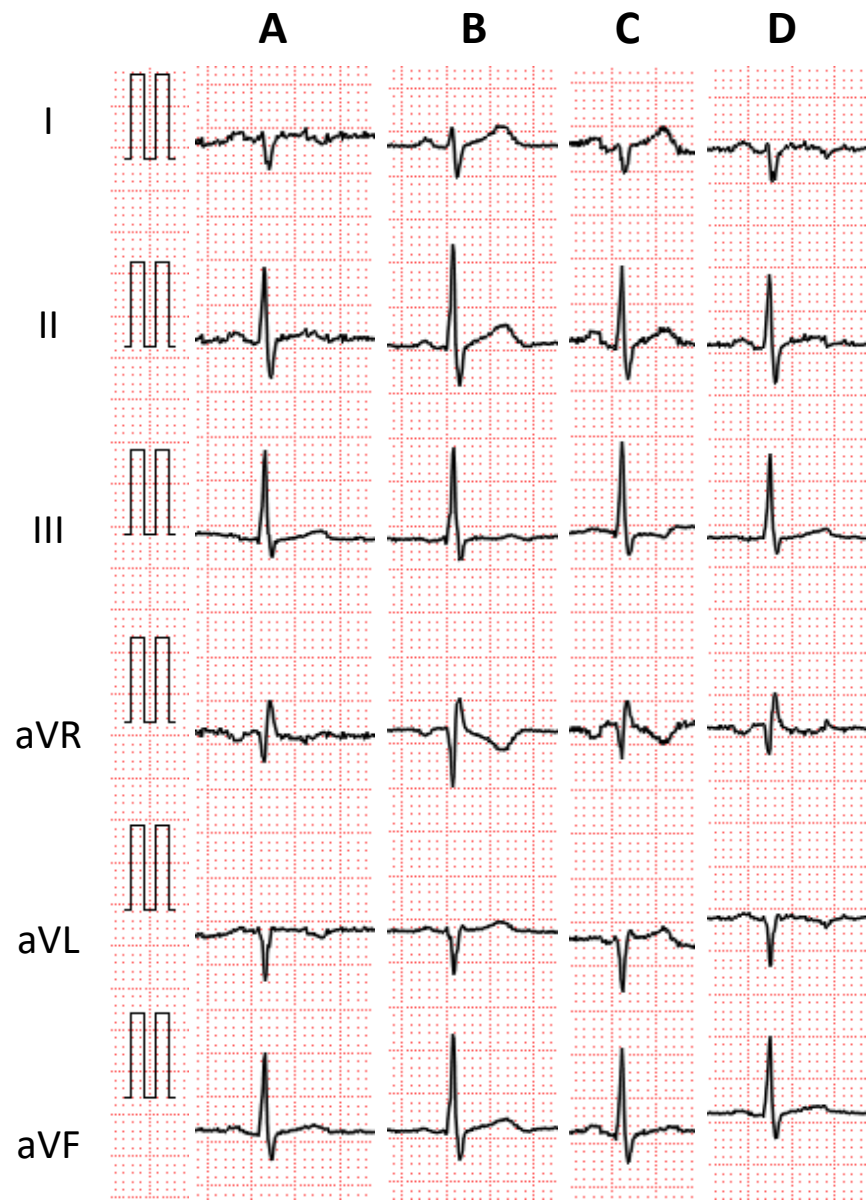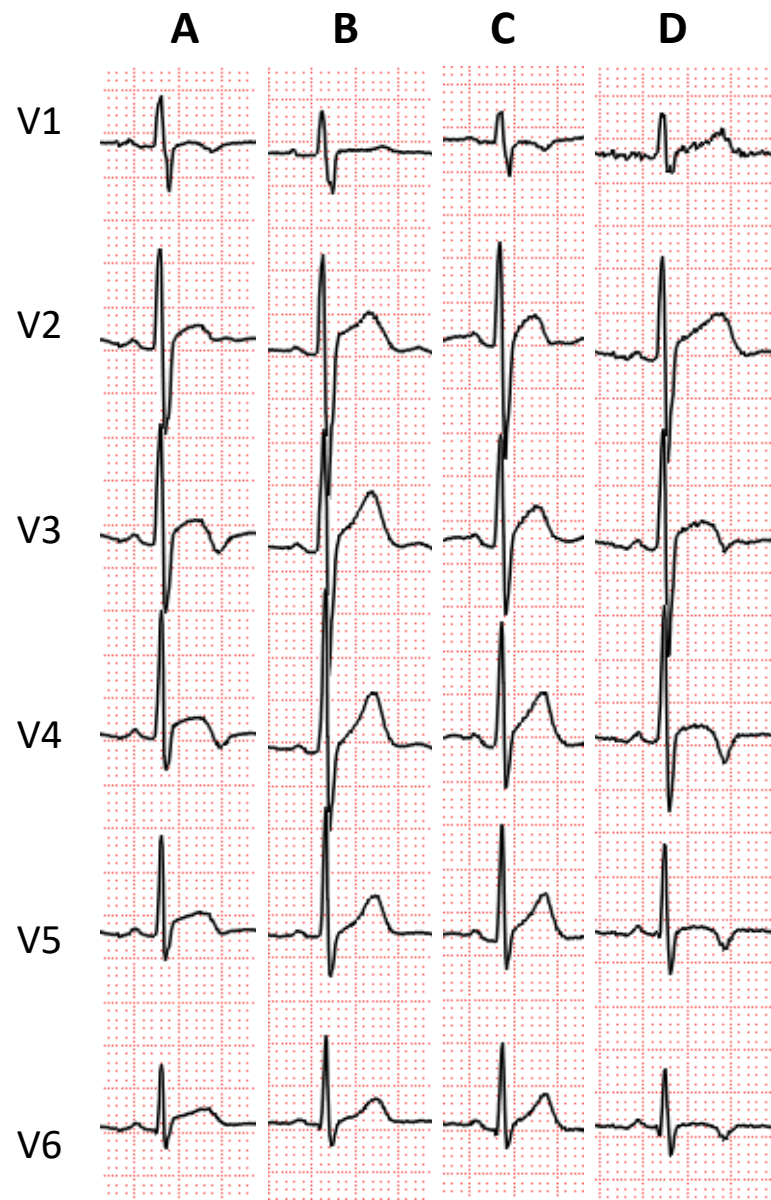

**A.** At the onset of the previous myocarditis (13-years old)  
**B.** 6 days before the second COVID-19 mRNA vaccination (day -8)  
**C.** 2 days after the second COVID-19 mRNA vaccination (day 0)  
**D.** Day 5

# Clinical course of this case (myocarditis associated with *Campylobacter jejuni* and with Covid-19 mRNA vaccination)

[normal range 62 – 287 IU/L]

[normal range  $\leq 0.014$  mg/dL]

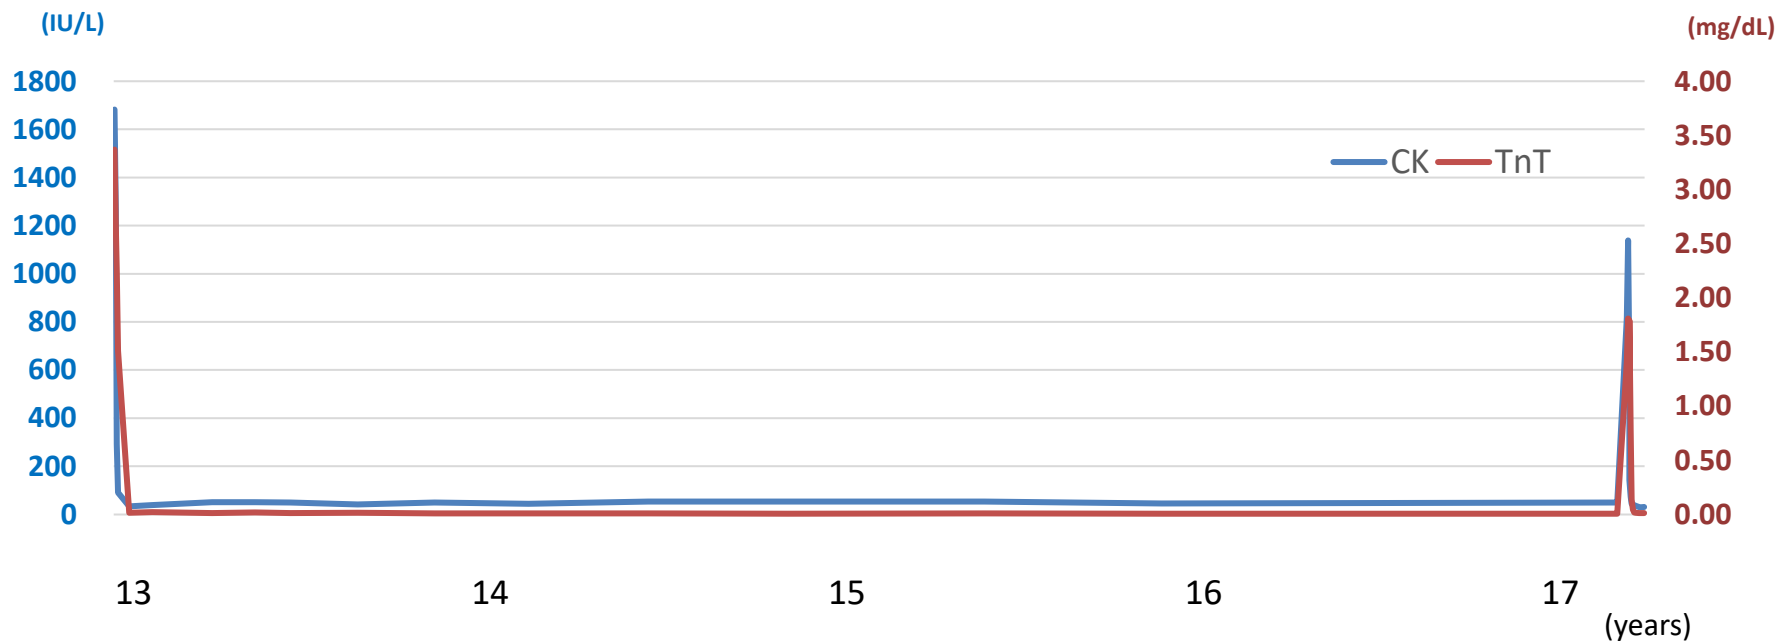

Supplement: Data_Sheet_1.pdf [file Data_Sheet_1.pdf]
